# Supplementary material
Source: publisher site journal article supplement (https://www.spandidos-publications.com/3178/downloadSupplementary)
Supplement: Supplementary file 1 [file downloadSupplementary]

Figure S1. Transfection effect of chiMDM2 and chiMDM4. Cells were transfected with chiMDM2 or chiMDM4 at the indicated concentrations for 48 h, then analyzed for protein expression by immunoblotting.  $\beta$ -actin was set as the internal control. chiMDM, DNA-chimera small interfering RNA against MDM; Cont, control.

|                  | HCT116                                                                            |     |   |     |   | LoVo                                                                               |     |   |     |   | SNU-1                                                                               |     |   |     |   |
|------------------|-----------------------------------------------------------------------------------|-----|---|-----|---|------------------------------------------------------------------------------------|-----|---|-----|---|-------------------------------------------------------------------------------------|-----|---|-----|---|
| chiCont (nmol/l) | 1                                                                                 | 0.5 |   | 0.5 |   | 1                                                                                  | 0.5 |   | 0.5 |   | 1                                                                                   | 0.5 |   | 0.5 |   |
| chiMDM2 (nmol/l) |                                                                                   | 0.5 | 1 |     |   |                                                                                    | 0.5 | 1 |     |   |                                                                                     | 0.5 | 1 |     |   |
| chiMDM4 (nmol/l) |                                                                                   |     |   | 0.5 | 1 |                                                                                    |     |   | 0.5 | 1 |                                                                                     |     |   | 0.5 | 1 |
| MDM2             |  |     |   |     |   |  |     |   |     |   |  |     |   |     |   |
| MDM4             |  |     |   |     |   |  |     |   |     |   |  |     |   |     |   |
| $\beta$ -actin   |  |     |   |     |   |  |     |   |     |   |  |     |   |     |   |

Figure S2. Flow cytometry plots of HCT116 (A), LoVo (B), and SNU-1 (C) of triplicate experiments. Cells transfected with chiCont (1.0 nmol/l) or chiMDM4/chiMDM2 (0.5 nmol/l each) for 24 h were exposed to trametinib (2.0 nmol/l) for 24 h and analyzed for cell cycle distribution and apoptosis by flow cytometry. chiMDM, DNA-chimera small interfering RNA against MDM; Cont, control.

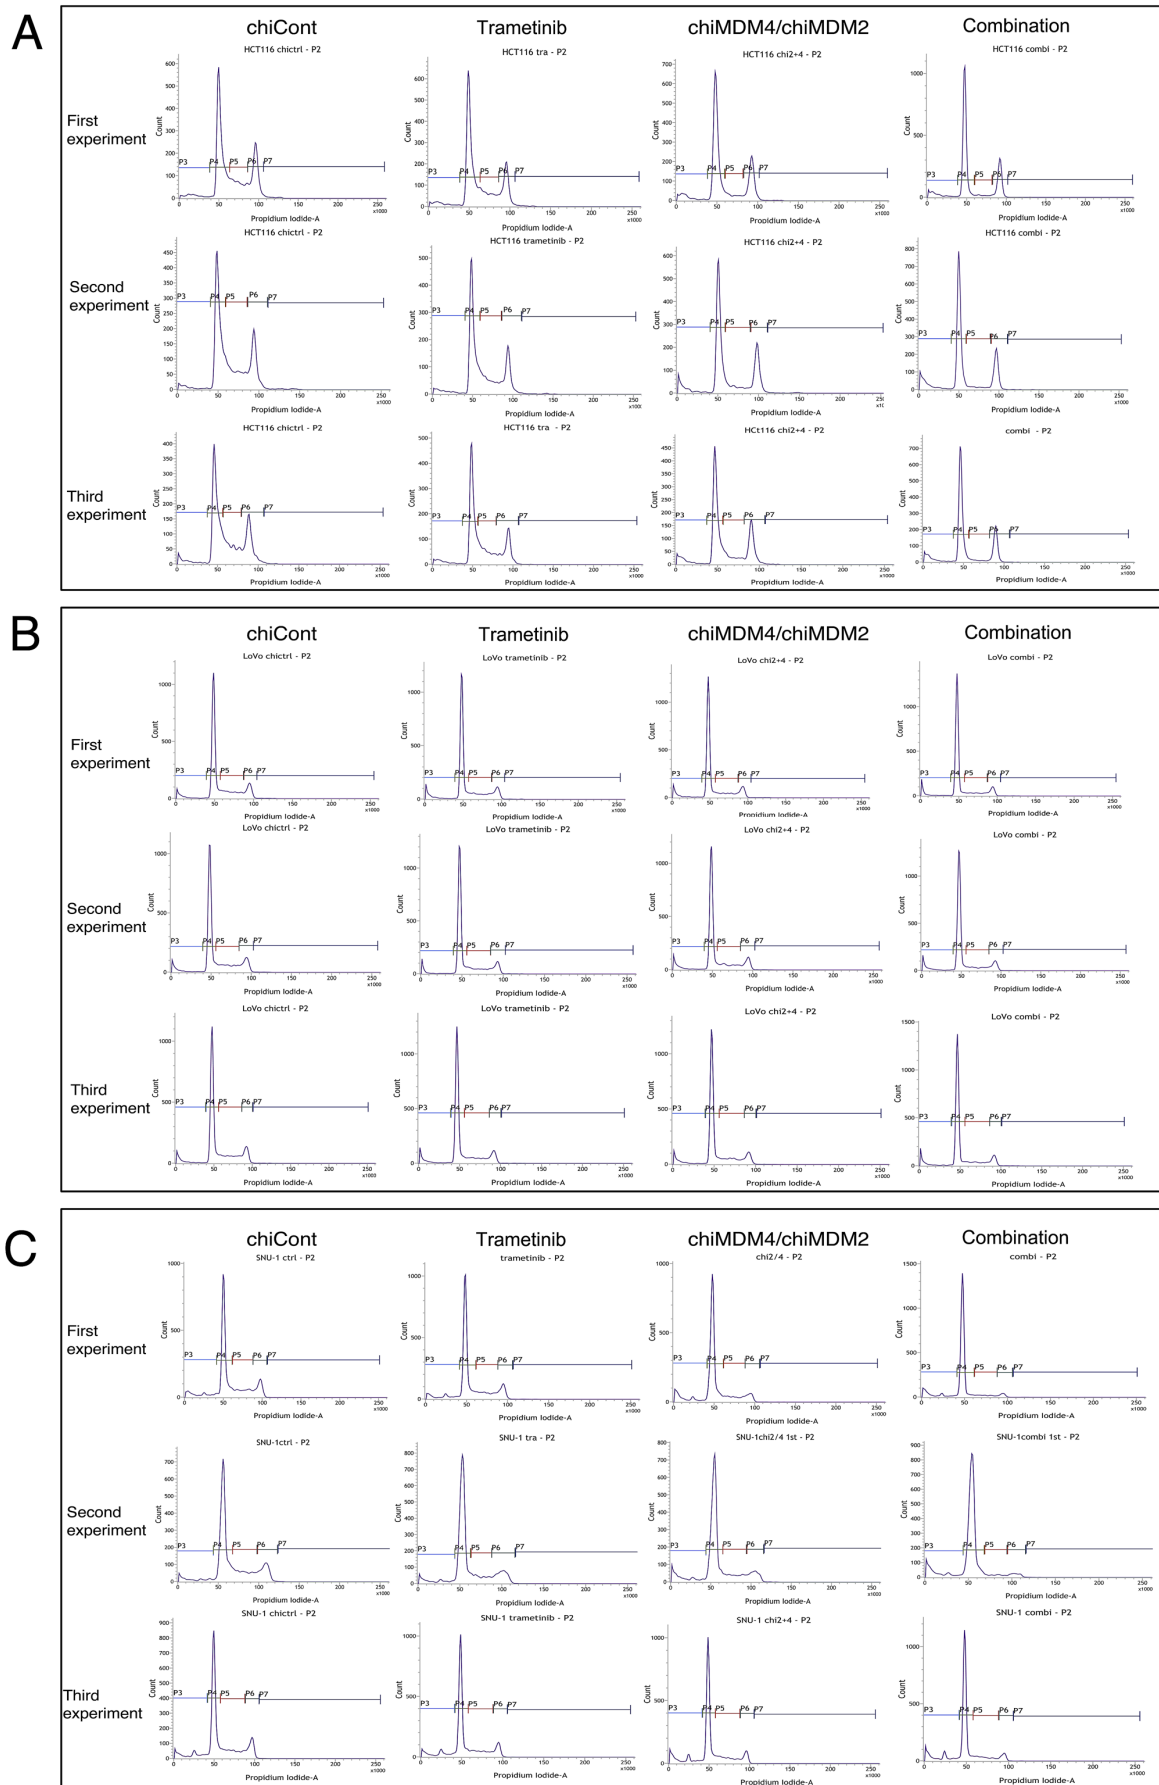

Figure S3. ChiMDM4/chiMDM2 and trametinib induced weak cleavage of caspase-8 in SNU-1 cells. Cells were transfected with chiCont (1.0 nmol/l) or chiMDM4/chiMDM2 (0.5 nmol/l each) overnight, followed by exposure to trametinib (2.0 nmol/l) for 24 h, and then analyzed for protein expression by immunoblotting. The volume of proteins used for immunoblotting was 40  $\mu$ g/lane.  $\beta$ -actin was set as the internal control. chiMDM, DNA-chimera small interfering RNA against MDM; Cont, control.

| cell line           | SNU-1                                                                             |   |   |   |
|---------------------|-----------------------------------------------------------------------------------|---|---|---|
| chiCont             | +                                                                                 | + | - | - |
| chiMDM2<br>+chiMDM4 | -                                                                                 | - | + | + |
| trametinib          | -                                                                                 | + | - | + |
| cleaved-CASP8       |  |   |   |   |
| $\beta$ -actin      |  |   |   |   |

Figure S4. Flow cytometry plots of *EGFP*- and *BCL2*-transduced HCT116 and LoVo. Cells were transfected with chiCont (1.0 nmol/l) or chiMDM4/chiMDM2 (0.5 nmol/l each) for 24 h, followed by exposure to trametinib (2.0 nmol/l) for 24 h, and the cell cycle distribution and apoptosis were analyzed by flow cytometry. chiMDM, DNA-chimera small interfering RNA against MDM; Cont, control; EGFP, enhanced green fluorescent protein.

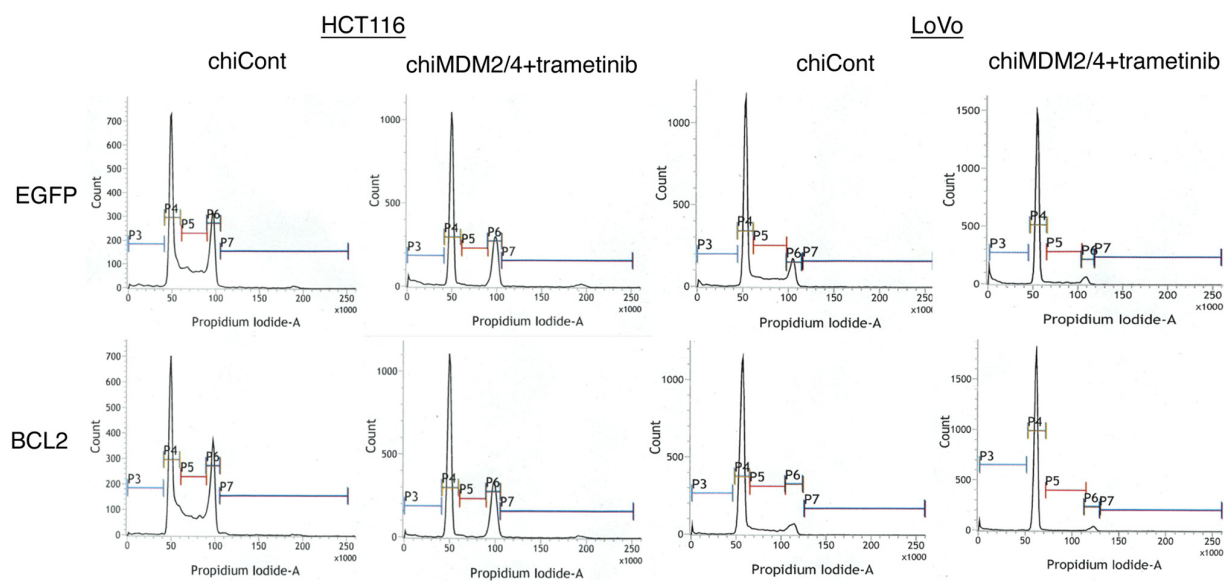

Table SI. Primary antibody list.

| Antigen                           | Catalogue number | Clonality (clone)              | Manufacturer                    |
|-----------------------------------|------------------|--------------------------------|---------------------------------|
| Apaf-1                            | 8,969            | Rabbit monoclonal (D5C3)       | Cell Signaling Technology, Inc. |
| $\beta$ -actin                    | PM053            | Rabbit polyclonal              | MBL International Co.           |
| BAX                               | M010-3           | Mouse monoclonal (4F11)        | MBL International Co.           |
| BCL2                              | 2,872            | Rabbit polyclonal              | Cell Signaling Technology, Inc. |
| MYC                               | 5,605            | Rabbit monoclonal (D84C12)     | Cell Signaling Technology, Inc. |
| Cleaved caspase-8                 | 9,496            | Rabbit monoclonal (18C8)       | Cell Signaling Technology, Inc. |
| Caspase-9                         | M054-3           | Mouse monoclonal (5B4)         | MBL International Co.           |
| CDC2                              | MT-19-3          | Mouse monoclonal (5F6)         | MBL International Co.           |
| CDC25A                            | K0072-3          | Mouse monoclonal (DCS-121)     | MBL International Co.           |
| CDK2                              | 2,546            | Rabbit monoclonal (78B2)       | Cell Signaling Technology, Inc. |
| CDK4                              | 12,790           | Rabbit monoclonal (D9G3E)      | Cell Signaling Technology, Inc. |
| Cyclin A                          | K0162-3          | Mouse monoclonal (E23.1)       | MBL International Co.           |
| Cyclin B1                         | K0128-3          | Mouse monoclonal (V152)        | MBL International Co.           |
| Cyclin D1                         | 2,978            | Rabbit monoclonal (92G2)       | Cell Signaling Technology, Inc. |
| Cyclin D3                         | 2,936            | Mouse monoclonal (DCS22)       | Cell Signaling Technology, Inc. |
| Cyclin E2                         | 4,132            | Rabbit polyclonal              | Cell Signaling Technology, Inc. |
| DNA polymerase $\delta$ (p125)    | K0160-3          | Rat monoclonal (5G1)           | MBL International Co.           |
| DR4                               | 42,533           | Rabbit monoclonal (D9S1R)      | Cell Signaling Technology, Inc. |
| DR5                               | 3,696            | Rabbit polyclonal              | Cell Signaling Technology, Inc. |
| E2F1                              | 05-379           | Mouse monoclonal (KH20 & KH95) | Upstate Biotechnology, Inc.     |
| ERK1/2                            | AM2189b          | Mouse monoclonal (784CT7.6.3)  | Abgent Biotec Co., Ltd.         |
| Phospho-ERK1/2<br>(Thr202/Tyr204) | AP3906a          | Rabbit polyclonal              | Abgent Biotec Co., Ltd.         |
| Fas                               | 4,233            | Rabbit monoclonal (C18C12)     | Cell Signaling Technology, Inc. |
| 14-3-3 $\sigma$                   | GTX100289        | Rabbit polyclonal              | GeneTex, Inc.                   |
| MDM2                              | ab16895          | Mouse monoclonal (2A10)        | Abcam                           |
| MDM4                              | sc-14738         | Goat polyclonal (D-19)         | Santa Cruz Biotechnology, Inc.  |
| p15INK4b                          | M124-3           | Mouse monoclonal (1F6)         | MBL International Co.           |
| p21CIP1                           | 2,946            | Mouse monoclonal (DCS60)       | Cell Signaling Technology, Inc. |
| p27KIP1                           | 3,686            | Rabbit monoclonal (D69C12)     | Cell Signaling Technology, Inc. |
| p53                               | MON 7051         | Mouse monoclonal (BP53-12)     | Cell Sciences, Inc.             |
| PCNA                              | MH-12-3          | Mouse monoclonal (5A10)        | MBL International Co.           |
| PolA2                             | A302-477A-T      | Rabbit polyclonal              | Bethyl Laboratories, Inc.       |
| PUMA                              | 4,976            | Rabbit polyclonal              | Cell Signaling Technology, Inc. |
| RB                                | 554,136          | Mouse monoclonal (G3-245)      | BD Biosciences                  |
| RRM1                              | GTX100758        | Rabbit polyclonal              | GeneTex, Inc.                   |
| Thymidylate synthase              | 9,045            | Rabbit monoclonal (D5B3)       | Cell Signaling Technology, Inc. |
